# Supplementary material for: Genotype specific starch characteristics in relation to resistant starch formation in table potatoes
Source: Royal Society of Chemistry journal article supplement (doi:10.1039/d3fo01626a), 2023-01-01
Supplement: d3fo01626a1.xlsx [file d3fo01626a1.xlsx]

## Sheet: UWW and DM
	Part A - Experiment 1: residual moisture after freeze drying
			method	UWW		oven method
			parameter/unit	DM %	starch %	DM %	residual moisture %
	sample		sampling date (removal from storage room)				exact	rounded
	Huckelberry Gold	raw tuber	August 2020	18.25	14.137	17.487	n.d.	n.d.
	Huckelberry Gold	24h after cooking	August 2020	n.d.	n.d.	19.0942	3.04649	0.03
	Huckelberry Gold	24h after cooking	August 2020	n.d.	n.d.	18.441	11.9096	0.12
	Part A - Experiment 2: cooking experiment with six table potato cultivars
		method	UWW		oven method	oven method
		parameter/unit	DM %	starch %	DM %	DM %
	sample	sampling date (removal from storage room)	raw tuber		raw tuber after peeling	0 h after cooking
cultivar	Huckelberry Gold	March 2020	17.629	13.5685	17.3	17.7
	Soraya	March 2020	18.2616	14.1121	17.5	18.3
	Goldmarie	March 2020	18.3197	14.162	17.8	18
	Mary Ann	March 2020	20.524	16.0559	18.8	18.8
	Adretta	March 2020	23.5462	18.6524	22	24.3
	Talent	March 2020	24.0301	19.0681	24.2	26.2
	Part B: starch isolation of six table potato cultivars
		method	UWW
		parameter/unit	DM %	starch %
	sample	sampling date (removal from storage room)	raw tuber
cultivar	Huckelberry Gold	December 2020	17.5531	13.5033
	Soraya	December 2020	18.3384	14.1781
	Goldmarie	December 2020	19.6164	15.2761
	Mary Ann	December 2020	23.6831	18.7699
	Adretta	December 2020	25.1939	20.068
	Talent	December 2020	24.7791	19.7117
	Abbreviations
	UWW = under water weight
	DM = dry matter
	n.d. = not determined
