# Supplementary material for: Genotype specific starch characteristics in relation to resistant starch formation in table potatoes
Source: Royal Society of Chemistry journal article supplement (doi:10.1039/d3fo01626a), 2023-01-01
Supplement: d3fo01626a2.pdf [file d3fo01626a2.pdf]

### Supplementary Material - S2

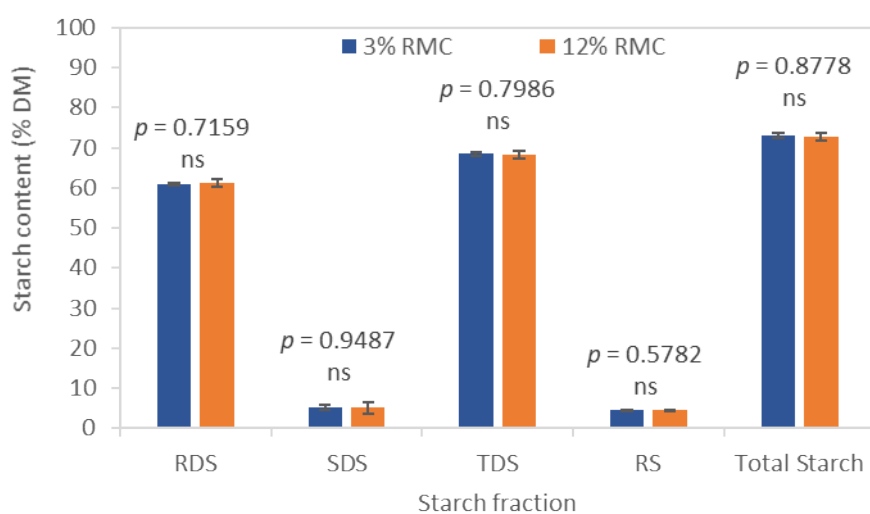

**S2** Comparison of residual moisture after freezing-freeze drying (3 and 12%) on starch digestibility for cultivar Huckleberry Gold, 24h after cooking, n = 3, mean ± Standard deviation; RMC = residual moisture content, ns = not significant.
