# Supplementary material for: Genotype specific starch characteristics in relation to resistant starch formation in table potatoes
Source: Royal Society of Chemistry journal article supplement (doi:10.1039/d3fo01626a), 2023-01-01
Supplement: d3fo01626a3.pdf [file d3fo01626a3.pdf]

### Supplementary Material – S3

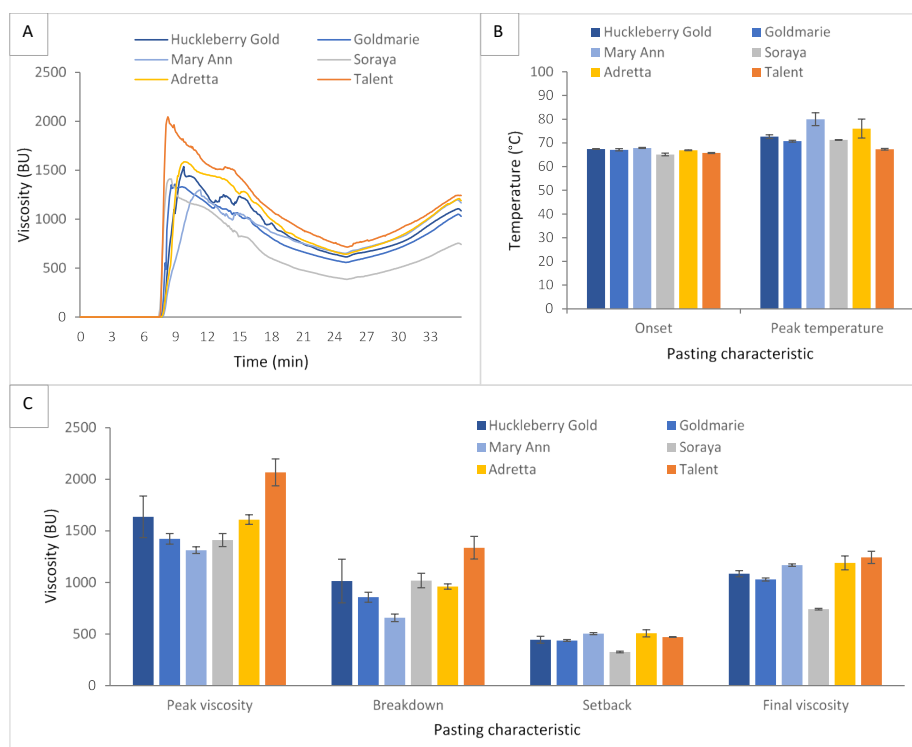

**S3a:** Pasting properties of raw freeze-dried potato tubers, determined on a Micro-Visco Amylograph, showing (A) average pasting curves; (B) average of relevant temperatures during determination and (C) average of relevant viscosities during determination. Cultivars are sorted according the cooking type (blue colors = firm cooking, grey – fairly firm cooking, yellow/orange – mealy cooking).  $n = 2$ , mean  $\pm$  standard deviation.

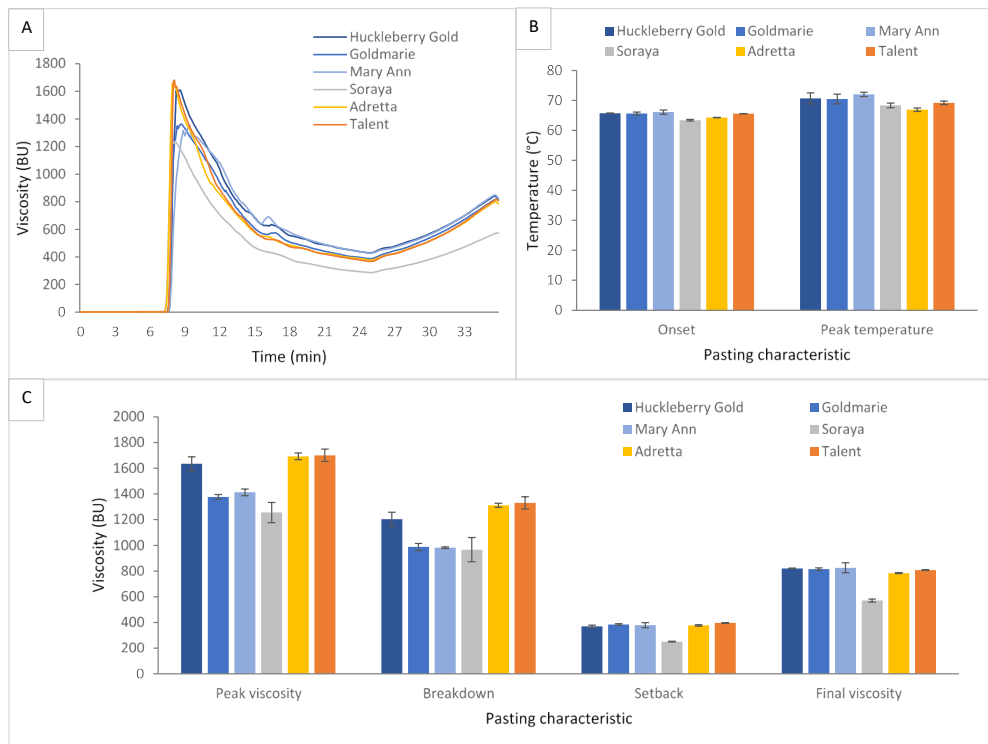

**S3b:** Pasting properties of extracted potato starches, determined on a Micro-Visco Amylograph, showing (A) average pasting curves; (B) average of relevant temperatures during determination and (C) average of relevant viscosities during determination. Cultivars from which starches were obtained are sorted according the cooking type (blue colors = firm cooking, grey – fairly firm cooking, yellow/orange – mealy cooking). n = 2, mean ± standard deviation.
